# Supplementary material for: Controlled Delivery of BET-PROTACs: In Vitro Evaluation of MZ1-Loaded Polymeric Antibody Conjugated Nanoparticles in Breast Cancer
Source: MDPI journal article supplement (doi:10.3390/pharmaceutics12100986), 2020-10-19
Supplement: s1 [file s1]

# Supplementary Materials: Controlled Delivery of BET-PROTACs: In Vitro Evaluation of MZ1-loaded Polymeric Antibody Conjugated Nanoparticles in Breast Cancer

Francisco J. Cimas, Enrique Niza, Alberto Juan, María del Mar Noblejas-López, Iván Bravo, Agustín Lara-Sanchez, Carlos Alonso-Moreno and Alberto Ocaña

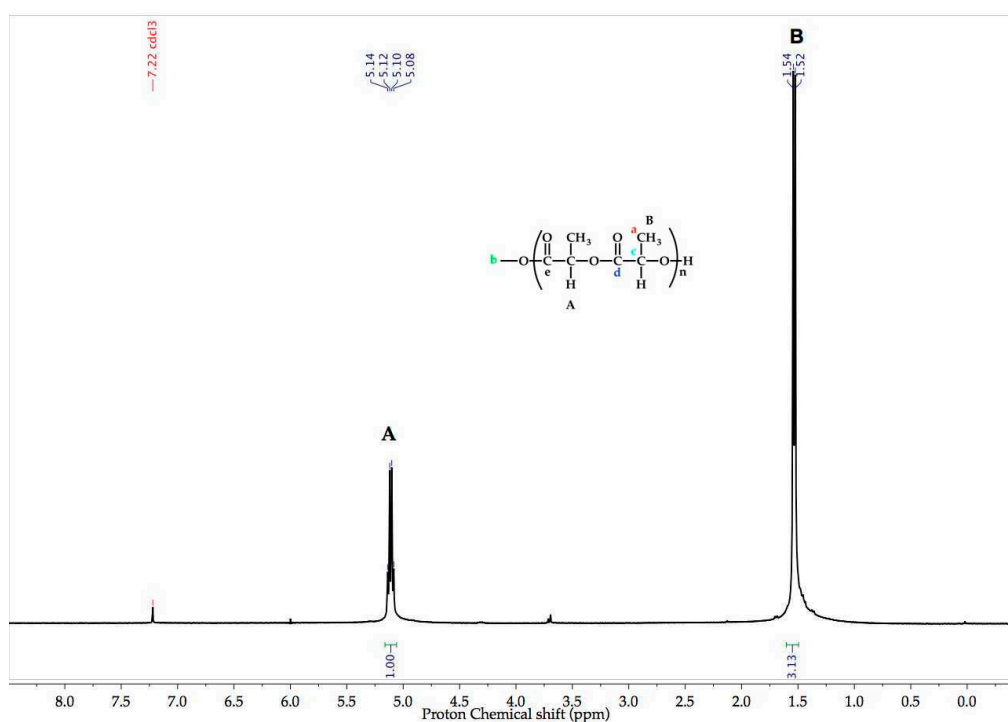

Figure S1. <sup>1</sup>H NMR of PLA.

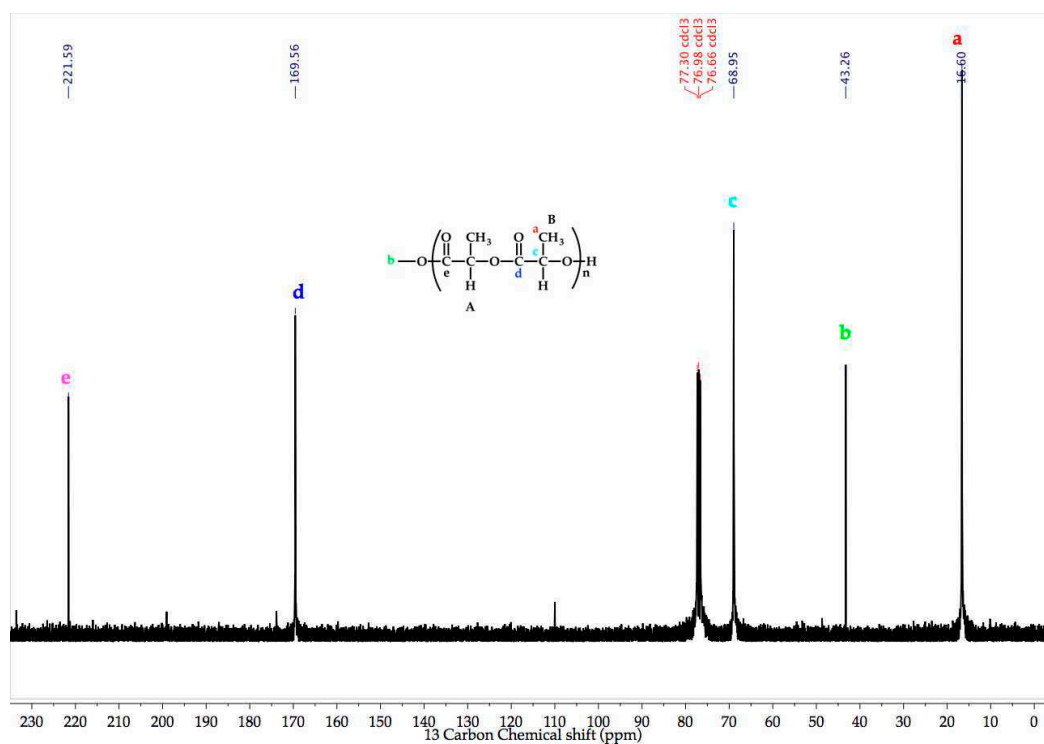

Figure S2.  $^{13}\text{C}\{^1\text{H}\}$  NMR of PLA.

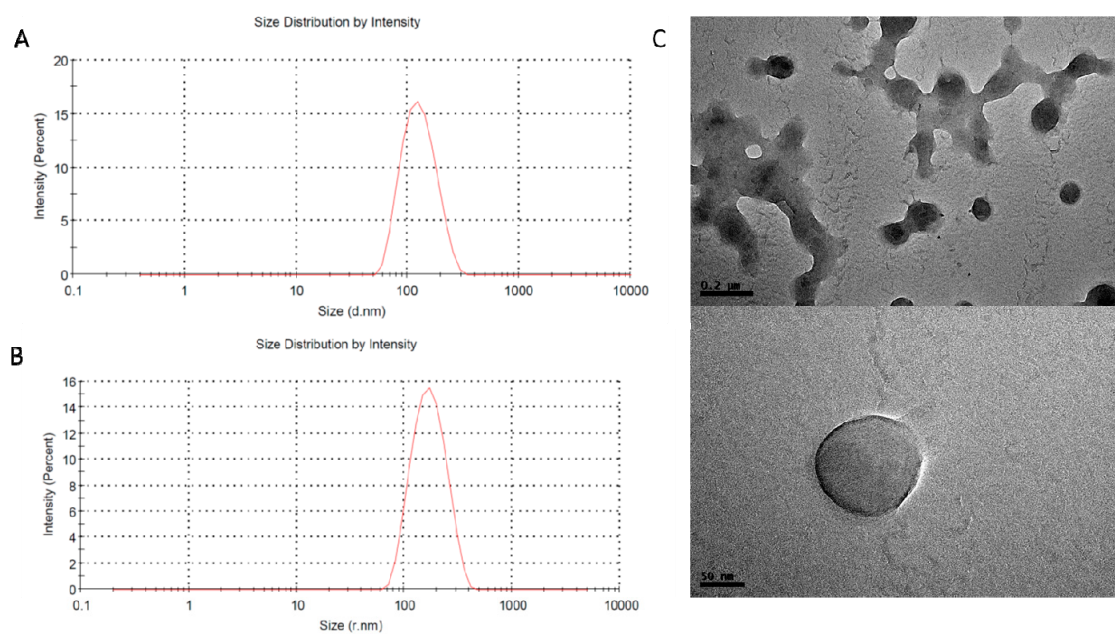

Figure S3. Size distribution curve for A) MZI-NPs, B) MZI-ACNPs and C) TEM images for MZI-NPs.

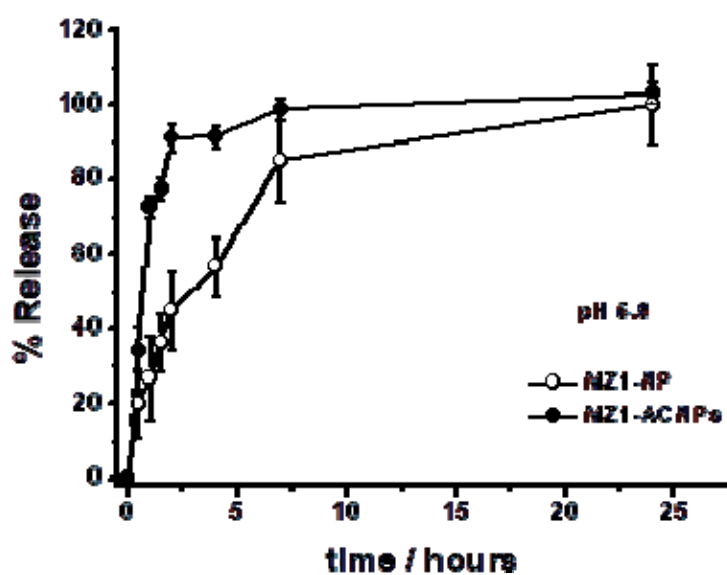

Figure S4. In vitro release profiles of MZ1-ACNPs at pH 5.8. Data are expressed as mean  $\pm$  s.e.m. from at least three independent experiments.

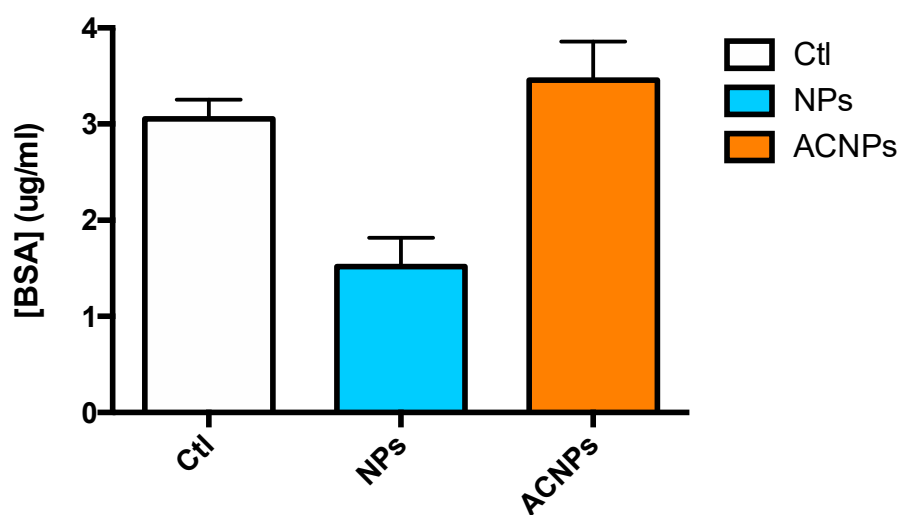

Figure 5. BCA analysis of protein corona formation. .
